# Supplementary material for: Comparative genomic and phenotypic description of Escherichia ruysiae: a newly identified member of the gut microbiome of the domestic dog
Source: Front Microbiol. 2025 Apr 1;16:1558802. doi: 10.3389/fmicb.2025.1558802 (PMC11997573; doi:10.3389/fmicb.2025.1558802)
Supplement: Supplementary file 2 [file Table_2.xlsx]

## Sheet: gtdbtk_v2
user_genome	classification	fastani_reference	fastani_reference_radius	fastani_taxonomy	fastani_ani	fastani_af	closest_placement_reference	closest_placement_radius	closest_placement_taxonomy	closest_placement_ani	closest_placement_af	pplacer_taxonomy	classification_method	note	other_related_references(genome_id,species_name,radius,ANI,AF)	msa_percent	translation_table	red_value	warnings
Escherichia_ruysiae_strain_ABC134	d__Bacteria;p__Proteobacteria;c__Gammaproteobacteria;o__Enterobacterales;f__Enterobacteriaceae;g__Escherichia;s__Escherichia ruysiae	GCF_902498915.1	95	d__Bacteria;p__Proteobacteria;c__Gammaproteobacteria;o__Enterobacterales;f__Enterobacteriaceae;g__Escherichia;s__Escherichia ruysiae	99.16	0.95	GCF_902498915.1	95	d__Bacteria;p__Proteobacteria;c__Gammaproteobacteria;o__Enterobacterales;f__Enterobacteriaceae;g__Escherichia;s__Escherichia ruysiae	99.16	0.95	d__Bacteria;p__Proteobacteria;c__Gammaproteobacteria;o__Enterobacterales;f__Enterobacteriaceae;g__Escherichia;s__	taxonomic classification defined by topology and ANI	topological placement and ANI have congruent species assignments	GCF_003697165.2, s__Escherichia coli, 95.0, 92.8, 0.84; GCF_005843885.1, s__Escherichia sp005843885, 95.0, 92.62, 0.86; GCF_002900365.1, s__Escherichia marmotae, 95.0, 92.18, 0.85; GCF_001660175.1, s__Escherichia sp001660175, 95.0, 92.13, 0.87; GCF_004211955.1, s__Escherichia sp004211955, 95.0, 91.88, 0.83; GCF_002965065.1, s__Escherichia sp002965065, 95.0, 91.86, 0.78; GCF_011881725.1, s__Escher…	97.72	11	N/A	N/A
Escherichia_ruysiae_strain_ABC135	d__Bacteria;p__Proteobacteria;c__Gammaproteobacteria;o__Enterobacterales;f__Enterobacteriaceae;g__Escherichia;s__Escherichia ruysiae	GCF_902498915.1	95	d__Bacteria;p__Proteobacteria;c__Gammaproteobacteria;o__Enterobacterales;f__Enterobacteriaceae;g__Escherichia;s__Escherichia ruysiae	99.19	0.94	GCF_902498915.1	95	d__Bacteria;p__Proteobacteria;c__Gammaproteobacteria;o__Enterobacterales;f__Enterobacteriaceae;g__Escherichia;s__Escherichia ruysiae	99.19	0.94	d__Bacteria;p__Proteobacteria;c__Gammaproteobacteria;o__Enterobacterales;f__Enterobacteriaceae;g__Escherichia;s__	taxonomic classification defined by topology and ANI	topological placement and ANI have congruent species assignments	GCF_003697165.2, s__Escherichia coli, 95.0, 92.83, 0.84; GCF_005843885.1, s__Escherichia sp005843885, 95.0, 92.68, 0.86; GCF_002900365.1, s__Escherichia marmotae, 95.0, 92.17, 0.85; GCF_001660175.1, s__Escherichia sp001660175, 95.0, 92.08, 0.87; GCF_004211955.1, s__Escherichia sp004211955, 95.0, 91.87, 0.83; GCF_002965065.1, s__Escherichia sp002965065, 95.0, 91.77, 0.78; GCF_011881725.1, s__Esche…	97.72	11	N/A	N/A
Escherichia_ruysiae_strain_ABC136	d__Bacteria;p__Proteobacteria;c__Gammaproteobacteria;o__Enterobacterales;f__Enterobacteriaceae;g__Escherichia;s__Escherichia ruysiae	GCF_902498915.1	95	d__Bacteria;p__Proteobacteria;c__Gammaproteobacteria;o__Enterobacterales;f__Enterobacteriaceae;g__Escherichia;s__Escherichia ruysiae	99.17	0.94	GCF_902498915.1	95	d__Bacteria;p__Proteobacteria;c__Gammaproteobacteria;o__Enterobacterales;f__Enterobacteriaceae;g__Escherichia;s__Escherichia ruysiae	99.17	0.94	d__Bacteria;p__Proteobacteria;c__Gammaproteobacteria;o__Enterobacterales;f__Enterobacteriaceae;g__Escherichia;s__	taxonomic classification defined by topology and ANI	topological placement and ANI have congruent species assignments	GCF_003697165.2, s__Escherichia coli, 95.0, 92.79, 0.83; GCF_005843885.1, s__Escherichia sp005843885, 95.0, 92.68, 0.86; GCF_002900365.1, s__Escherichia marmotae, 95.0, 92.18, 0.85; GCF_001660175.1, s__Escherichia sp001660175, 95.0, 92.05, 0.87; GCF_004211955.1, s__Escherichia sp004211955, 95.0, 91.81, 0.83; GCF_002965065.1, s__Escherichia sp002965065, 95.0, 91.78, 0.77; GCF_011881725.1, s__Esche…	97.72	11	N/A	N/A
Escherichia_ruysiae_strain_ABC137	d__Bacteria;p__Proteobacteria;c__Gammaproteobacteria;o__Enterobacterales;f__Enterobacteriaceae;g__Escherichia;s__Escherichia ruysiae	GCF_902498915.1	95	d__Bacteria;p__Proteobacteria;c__Gammaproteobacteria;o__Enterobacterales;f__Enterobacteriaceae;g__Escherichia;s__Escherichia ruysiae	99.16	0.94	GCF_902498915.1	95	d__Bacteria;p__Proteobacteria;c__Gammaproteobacteria;o__Enterobacterales;f__Enterobacteriaceae;g__Escherichia;s__Escherichia ruysiae	99.16	0.94	d__Bacteria;p__Proteobacteria;c__Gammaproteobacteria;o__Enterobacterales;f__Enterobacteriaceae;g__Escherichia;s__	taxonomic classification defined by topology and ANI	topological placement and ANI have congruent species assignments	GCF_003697165.2, s__Escherichia coli, 95.0, 92.8, 0.83; GCF_005843885.1, s__Escherichia sp005843885, 95.0, 92.67, 0.86; GCF_002900365.1, s__Escherichia marmotae, 95.0, 92.19, 0.85; GCF_001660175.1, s__Escherichia sp001660175, 95.0, 92.08, 0.86; GCF_004211955.1, s__Escherichia sp004211955, 95.0, 91.86, 0.83; GCF_002965065.1, s__Escherichia sp002965065, 95.0, 91.73, 0.78; GCF_011881725.1, s__Escher…	97.72	11	N/A	N/A

## Sheet: Checkm2
Name	Completeness	Contamination	Completeness_Model_Used	Translation_Table_Used	Coding_Density	Contig_N50	Average_Gene_Length	Genome_Size	GC_Content	Total_Coding_Sequences	Total_Contigs	Max_Contig_Length	Additional_Notes
Escherichia_ruysiae_strain_ABC134	100	0.02	Neural Network (Specific Model)	11	0.88	4540385	319.17	4635588	0.51	4266	2	4540385	None
Escherichia_ruysiae_strain_ABC135	100	0.03	Neural Network (Specific Model)	11	0.88	4537266	318.871	4632218	0.51	4267	2	4537266	None
Escherichia_ruysiae_strain_ABC136	100	0.04	Neural Network (Specific Model)	11	0.88	4540375	319.355	4635326	0.51	4263	2	4540375	None
Escherichia_ruysiae_strain_ABC137	100	0.03	Neural Network (Specific Model)	11	0.88	4540363	318.441	4635425	0.51	4276	2	4540363	None

## Sheet: missing_genes_COG
LETTER	COUNT	COLOR	DESCRIPTION
J	28	#FCCCFC	Translation, ribosomal structure and biogenesis
A	0	#FCDCFC	RNA processing and modification
K	22	#FCDCEC	Transcription
L	6	#FCDCDC	Replication, recombination and repair
B	0	#FCDCCC	Chromatin structure and dynamics
D	12	#FCFCDC	Cell cycle control, cell division, chromosome partitioning
Y	0	#FCFCCC	Nuclear structure
V	2	#FCFCBC	Defense mechanisms
T	6	#FCFCAC	Signal transduction mechanisms
M	26	#ECFCAC	Cell wall/membrane/envelope biogenesis
N	69	#DCFCAC	Cell motility
Z	0	#CCFCAC	Cytoskeleton
W	8	#BCFCAC	Extracellular structures
U	3	#ACFCAC	Intracellular trafficking, secretion, and vesicular transport
O	17	#9CFCAC	Posttranslational modification, protein turnover, chaperones
X	5	#9CFC9C	Mobilome: prophages, transposons
C	44	#BCFCFC	Energy production and conversion
G	29	#CCFCFC	Carbohydrate transport and metabolism
E	9	#DCFCFC	Amino acid transport and metabolism
F	1	#DCECFC	Nucleotide transport and metabolism
H	13	#DCDCFC	Coenzyme transport and metabolism
I	22	#DCCCFC	Lipid transport and metabolism
P	40	#CCCCFC	Inorganic ion transport and metabolism
Q	0	#BCCCFC	Secondary metabolites biosynthesis, transport and catabolism
R	11	#E0E0E0	General function prediction only
S	2	#CCCCCC	Function unknown
